# Supplementary material for: Parenting Stress and Resilience in Parents of Children With Autism Spectrum Disorder (ASD) in Southeast Asia: A Systematic Review
Source: PubMed Central journal article supplement (PMC5900388; doi:10.3389/fpsyg.2018.00280), 2018-04-09
Supplement: Table2.pdf [file Table2.pdf]

Supplementary Table 2. Characteristics of Parents Sampled in this Systematic Review

| <b>Study</b>                     | <b><i>N</i></b>                                                         | <b>Age of Mother</b>                                                                                        | <b>Age of Father</b> | <b>Mothers' Education/<br/>Employment Status</b>                                                                                                                               | <b>Fathers' Education/<br/>Employment Status.</b> | <b>No. of Children</b>                                                                            |
|----------------------------------|-------------------------------------------------------------------------|-------------------------------------------------------------------------------------------------------------|----------------------|--------------------------------------------------------------------------------------------------------------------------------------------------------------------------------|---------------------------------------------------|---------------------------------------------------------------------------------------------------|
| Athari, Ghaedi and Kosnin (2013) | 250 mothers.                                                            | Not stated.                                                                                                 | n/a                  | Not stated.                                                                                                                                                                    | n/a                                               | Not stated.                                                                                       |
| Callos (2012)                    | 20 parents (17 mothers, 3 fathers).                                     | Including both mothers and fathers: age range = 20 – 35 years old (n = 12), more than 35 years old (n = 8). |                      | Including both mothers and fathers: high school graduate (n = 6), college graduate (n = 14).<br><br>Including both mothers and fathers: working (n = 12), not working (n = 8). |                                                   | Including both mothers and fathers: one to two children (n = 11), more than two children (n = 9). |
| Charnsil and Bathia (2010)       | 27 caregivers (24 parents, 3 relatives).<br><br>(15 females, 12 males). | Including all caregivers, $M = 46.70$ years, $SD = 8.50$ years.                                             |                      | Including all caregivers, years of education ( $M = 11.34$ , $SD = 5.03$ )                                                                                                     |                                                   | Not stated.                                                                                       |

| <b>Study</b>             | <b><i>N</i></b>                                                                                                       | <b>Age of Mother</b>                                     | <b>Age of Father</b> | <b>Mothers' Education/<br/>Employment Status</b>                                                                                                                    | <b>Fathers' Education/<br/>Employment Status.</b> | <b>No. of Children</b>                                                                                                                                            |
|--------------------------|-----------------------------------------------------------------------------------------------------------------------|----------------------------------------------------------|----------------------|---------------------------------------------------------------------------------------------------------------------------------------------------------------------|---------------------------------------------------|-------------------------------------------------------------------------------------------------------------------------------------------------------------------|
| Chong and Kua (2016)     | 10 mothers.                                                                                                           | Age range = 34 – 51 years; <i>M</i> = 40.2 years,        | n/a                  | Not stated. However, mother's occupation was reported: housewives (n = 4); middle–high income jobs (n = 6).                                                         | n/a                                               | Including the child with ASD, one child (n = 5); two children (n = 5).                                                                                            |
| Foo, Yap and Sung (2014) | 6 (3 mothers, 3 fathers).                                                                                             | Parents' age range = 36 – 49 years; <i>M</i> = 44 years. |                      | Secondary education, n = 1; diploma, n = 2; bachelor's degree, n = 1; master's degree, n = 2<br><br>(All mothers in the study were housewives).                     |                                                   | Not stated.                                                                                                                                                       |
| Foronda (2000)           | 16 single mothers: spouses were abroad for a long period of time due to work/study (n = 9); widows (n = 3); separated | Majority were 31 – 40 years (n = 13; 81.2%).             | n/a                  | Majority had attended college (n = 11; 68.7%), with four of them (25%) having attended vocational school and one of them (6.3%) having studied to a master's level. | n/a                                               | Including the child with ASD, majority (n = 7; 43.8%) had two children, followed by one child (n = 5; 31.3%), whereas an equal number of single mothers had three |

| <b>Study</b>                                 | <b><i>N</i></b>                | <b>Age of Mother</b>                              | <b>Age of Father</b> | <b>Mothers' Education/<br/>Employment Status</b>                                                                                                                                                                                                                            | <b>Fathers' Education/<br/>Employment Status.</b> | <b>No. of Children</b>                                                                                                                                                                                                      |
|----------------------------------------------|--------------------------------|---------------------------------------------------|----------------------|-----------------------------------------------------------------------------------------------------------------------------------------------------------------------------------------------------------------------------------------------------------------------------|---------------------------------------------------|-----------------------------------------------------------------------------------------------------------------------------------------------------------------------------------------------------------------------------|
|                                              | (n = 3);<br>unmarried (n = 1). |                                                   |                      | In terms of employment:<br>housewives (n = 6; 37.5%); housewives but conducted part-time sales (n = 3; 18.8%); employed (n = 5; 31.3%); self-employed (n = 2; 12.5%).                                                                                                       |                                                   | children (n = 2; 12.5%), and four or more children (n = 2; 12.5%).                                                                                                                                                          |
| Ilias, Liaw, Cornish, Park and Golden (2016) | 8 mothers                      | Age range = 32 – 59 years; <i>M</i> = 43.5 years. | n/a                  | High school (n = 2), pre-university (n = 1), diploma (n = 1), bachelor's degree (n = 2), master's degree (n = 2).<br><br>Employment status:<br>housewife (n = 3), student (n = 1), full-time office work (n = 1), part-time work (n = 1), and part-time freelancer (n = 1). | n/a                                               | Six mothers had one child with ASD, and two mothers had two children with ASD.<br><br>Number of other children was not reported, but the number of household members was reported: four (n = 4), five (n = 3), six (n = 1). |

| <b>Study</b>                                | <b><i>N</i></b>                                                                                                                                       | <b>Age of Mother</b>                                                      | <b>Age of Father</b> | <b>Mothers' Education/<br/>Employment Status</b>                                                                                                                                                                                       | <b>Fathers' Education/<br/>Employment Status.</b> | <b>No. of Children</b>                                                                  |
|---------------------------------------------|-------------------------------------------------------------------------------------------------------------------------------------------------------|---------------------------------------------------------------------------|----------------------|----------------------------------------------------------------------------------------------------------------------------------------------------------------------------------------------------------------------------------------|---------------------------------------------------|-----------------------------------------------------------------------------------------|
| Ha, Whittaker, Whittaker, and Rodger (2014) | 27 parents (21 mothers, 6 fathers), among which, there were three couples.                                                                            | Including both mothers and fathers, age range = 28 – 56 years old.        |                      | Including both mothers and fathers, majority had at least graduated with an undergraduate degree. Only three participants had high school level education.                                                                             |                                                   | All parents had only one child with ASD. Number of other children was not reported.     |
| Lai, Goh, Oei, and Sung (2015)              | 136 parents. (110 mothers, 26 fathers).<br><br>73 parents (54%) had a child with ASD, whereas 63 parents (46%) had children with typical development. | Including both mothers and fathers, $M = 43.68$ years, $SD = 6.36$ years. |                      | Including both mothers and fathers: university/postgraduate ( $n = 50$ ; 36.8%), polytechnic/pre-university ( $n = 30$ ; 22%), secondary/vocational ( $n = 45$ ; 33.1%), primary or below ( $n = 3$ , 2.2%), others ( $n = 8$ ; 5.9%). |                                                   | Of the total 136 parents, 5 (3.7%) parents reported having an additional child with ASD |
| Liwag (1989)                                | 13 families (13 mothers, 12 fathers).                                                                                                                 | $M = 35.8$ years                                                          | $M = 36.48$ years    | Families (mothers and fathers) were reported to be well educated, financially stable and                                                                                                                                               |                                                   | Average number of children in the family is three,                                      |

| <b>Study</b>                          | <b><i>N</i></b>                      | <b>Age of Mother</b>                                                                                            | <b>Age of Father</b> | <b>Mothers' Education/<br/>Employment Status</b>                                                                                                                                                                                                   | <b>Fathers' Education/<br/>Employment Status.</b> | <b>No. of Children</b>                                                                                                                                                                        |
|---------------------------------------|--------------------------------------|-----------------------------------------------------------------------------------------------------------------|----------------------|----------------------------------------------------------------------------------------------------------------------------------------------------------------------------------------------------------------------------------------------------|---------------------------------------------------|-----------------------------------------------------------------------------------------------------------------------------------------------------------------------------------------------|
|                                       |                                      |                                                                                                                 |                      | hold middle level to high level positions in their workforce.                                                                                                                                                                                      |                                                   | including the child with autism.                                                                                                                                                              |
| Moh and Magiati (2012)                | 102 (85 mothers, 17 fathers).        | Including both mothers and fathers, age range = 32 – 63 years ( <i>M</i> = 39.8 years, <i>SD</i> = 5.02 years). |                      | Vocational qualification ( <i>n</i> = 5), Below tertiary education ( <i>n</i> = 48), Tertiary education or above ( <i>n</i> = 48).<br><br>One parent failed to provide a response on education qualification.                                      |                                                   | Out of the 99 responses received on birth order, instances in which the child with ASD is the: only child ( <i>n</i> = 18), first child ( <i>n</i> = 34), 2nd/3rd/4th child ( <i>n</i> = 47). |
| Nikmat, Ahmad, Oon, and Razali (2008) | 52 parents (34 mothers, 18 fathers). | 24 parents (46.2%) were in age range = 21 – 30 years, whereas 28 parents were between 31 – 40 years of age.     |                      | 34 parents (65.4%) completed tertiary education, while 18 (34.6%) of them completed up to their secondary education.<br><br>Majority of the parents ( <i>n</i> = 31; 59.6%) worked in private sectors, followed by government sectors ( <i>n</i> = |                                                   | Not stated.                                                                                                                                                                                   |

| Study                                                           | <i>N</i>                                                                                                                                                     | Age of Mother                                                                                                                | Age of Father | Mothers' Education/<br>Employment Status                                                                                | Fathers' Education/<br>Employment Status. | No. of Children                                                                                                                    |
|-----------------------------------------------------------------|--------------------------------------------------------------------------------------------------------------------------------------------------------------|------------------------------------------------------------------------------------------------------------------------------|---------------|-------------------------------------------------------------------------------------------------------------------------|-------------------------------------------|------------------------------------------------------------------------------------------------------------------------------------|
|                                                                 |                                                                                                                                                              |                                                                                                                              |               | 14; 26.9%) whereas some were housewives (n = 7; 13.5%).                                                                 |                                           |                                                                                                                                    |
| Quilendrino, Castor, Mendoza, Ve, and Castillo-Carandang (2015) | Phase 1 (Focus group discussion): 15 parents of 10 children with autism (9 mothers, 6 fathers).<br><br>Phase 2 (Survey): 41 parents (34 mothers, 7 fathers). | Including both mothers and fathers, Phase 1: $M = 39$ years, $SD = 7$ years.<br><br>Phase 2: $M = 36$ years, $SD = 6$ years. |               | Not stated. However, including both mothers and fathers, number of parents employed: Phase 1 (n = 7); Phase 2 (n = 23). |                                           | Number of children with autism: Phase 1: one (n = 8), two (n = 1); Phase 2: one (n = 41). Number of other children was not stated. |
| Rahman, Ismail, Jaafar, Fong, Sharip, and Midin (2012)          | One couple (a father and a mother).                                                                                                                          | 36 years.                                                                                                                    | 39 years.     | Did not complete secondary education.                                                                                   | Did not complete secondary education.     | Two.                                                                                                                               |
| Rejani and Ting (2015)                                          | 20 parents (10 mothers, 10 fathers).                                                                                                                         | Including both mothers and fathers, $M = 39.5$ years.                                                                        |               | Not stated.                                                                                                             | Not stated.                               | Not stated.                                                                                                                        |

| <b>Study</b>                       | <b><i>N</i></b>                                                                                                                                                                                                                                                | <b>Age of Mother</b>                                | <b>Age of Father</b>                          | <b>Mothers' Education/<br/>Employment Status</b>                                 | <b>Fathers' Education/<br/>Employment Status.</b> | <b>No. of Children</b> |
|------------------------------------|----------------------------------------------------------------------------------------------------------------------------------------------------------------------------------------------------------------------------------------------------------------|-----------------------------------------------------|-----------------------------------------------|----------------------------------------------------------------------------------|---------------------------------------------------|------------------------|
| Resurreccion (2013)                | 10 couples (i.e., 10 mothers, 10 fathers).                                                                                                                                                                                                                     | Age range = 27 – 52 years ( <i>M</i> = 43.6 years). | Age range = 28 – 54 years ( <i>M</i> = 45.8). | Low SES = four families; Middle SES = three families; High SES = three families. |                                                   | Not stated.            |
| Roffeei, Abdullah and Basar (2015) | Memberships of the two Facebook groups: Autism Malaysia (n = 3972); Autism Children Club (n = 4, 094).<br><br>Including both groups, approximately 80% of members were parents, whilst remaining 20% were special education teachers, providers of ASD-related | Not stated.                                         | Not stated.                                   | Not stated.                                                                      | Not stated.                                       | Not stated.            |

| <b>Study</b>                                     | <b><i>N</i></b>                                                                                                                                          | <b>Age of Mother</b>  | <b>Age of Father</b>                                           | <b>Mothers' Education/<br/>Employment Status</b>                                                        | <b>Fathers' Education/<br/>Employment Status.</b> | <b>No. of Children</b> |
|--------------------------------------------------|----------------------------------------------------------------------------------------------------------------------------------------------------------|-----------------------|----------------------------------------------------------------|---------------------------------------------------------------------------------------------------------|---------------------------------------------------|------------------------|
|                                                  | products and services, health professionals, academic researchers, and other individuals who may be directly or indirectly related to children with ASD. |                       |                                                                |                                                                                                         |                                                   |                        |
| Santoso, Ito, Ohshima, Hidaka, and Bontje (2015) | 14 mothers.                                                                                                                                              | <i>M</i> = 40.3 Years | Not included in study sample, though all mothers were married. | Homemaker (n = 9); Private employer (n = 2); Private business (n = 1); Dentist (n = 1); Lawyer (n = 1). | n/a                                               | Not stated.            |

| <b>Study</b>           | <b><i>N</i></b>                                       | <b>Age of Mother</b>                                                                                          | <b>Age of Father</b>                                   | <b>Mothers' Education/<br/>Employment Status</b>                                                                                              | <b>Fathers' Education/<br/>Employment Status.</b>                                                   | <b>No. of Children</b>                                |
|------------------------|-------------------------------------------------------|---------------------------------------------------------------------------------------------------------------|--------------------------------------------------------|-----------------------------------------------------------------------------------------------------------------------------------------------|-----------------------------------------------------------------------------------------------------|-------------------------------------------------------|
| Siah and Tan (2015)    | 96 parents (72 mothers, 24 fathers).                  | Including both mothers and fathers: 30 years or below (5.2%), 31 – 45 years (72%), 45 years or above (41.7%). |                                                        | Including both mothers and fathers: none or primary school level (11.5%), secondary school level (49%), above secondary school level (39.6%). |                                                                                                     | Number of children with ASD: one (97.9%), two (2.1%). |
| Siah and Tan (2016)    | 92 parents (69 mothers, 23 fathers)                   | Including both mothers and fathers; below 45 years (58.3%), above 45 years (41.7%)                            |                                                        | Including both mothers and fathers: secondary or below (49%), above secondary (39.6%).<br><br>Held a full or part-time job (41.9%).           |                                                                                                     | Not stated.                                           |
| Sian and Tan (2012)    | 47 parents (36 mothers, 11 fathers).                  | Including both mothers and fathers, 74% of the were aged 36 or above.                                         |                                                        | 37% of the parents had completed an education beyond the secondary level.                                                                     |                                                                                                     | Not stated.                                           |
| Tait and Mundia (2012) | 40 parents (30 mothers, 10 fathers) from 30 families. | Age range = 23 – 45 years.                                                                                    | Age range: 23 – 44 years.<br><br>Mean age during birth | 8 mothers (26.6%) were homemakers, whereas majority of them (n = 21; 70%) held full-time working positions, and                               | As according to the Scale of Occupational Prestige (Jones, 1989), majority of fathers (n = 22) fell | Not stated.                                           |

| <b>Study</b>                                 | <b><i>N</i></b>                                                       | <b>Age of Mother</b>                                                                         | <b>Age of Father</b>          | <b>Mothers' Education/<br/>Employment Status</b>                                                                                                                       | <b>Fathers' Education/<br/>Employment Status.</b> | <b>No. of Children</b>                                                                                      |
|----------------------------------------------|-----------------------------------------------------------------------|----------------------------------------------------------------------------------------------|-------------------------------|------------------------------------------------------------------------------------------------------------------------------------------------------------------------|---------------------------------------------------|-------------------------------------------------------------------------------------------------------------|
|                                              |                                                                       | Mean age during birth of child with ASD = 30.5 years.                                        | of child with ASD = 32 years. | only one mother held an upper class working position (i.e., Director).                                                                                                 | into categories of lower to upper-middle class.   |                                                                                                             |
| Ting and Chua (2010)                         | 12 parents (8 mothers, 4 fathers)                                     | Including both mothers and fathers, age range = 29 – 48 years.                               |                               | Varied among parents; no further information were provided.                                                                                                            |                                                   | Not stated.                                                                                                 |
| Vetrayan, Daud, and Paulraj (2013)           | 33 parents.                                                           | Including both mothers and fathers, age range = 31 – 60 years ( $M = 39$ years, 5 months).   |                               | Including both mothers and fathers: Tertiary education (63.6%), secondary education (36.4%)                                                                            |                                                   |                                                                                                             |
| Wahyuni (2013)                               | 2 mothers.                                                            | Not stated.                                                                                  | n/a                           | Not stated.                                                                                                                                                            | n/a                                               | Not stated.                                                                                                 |
| Wisessathorn, Chanuantong, and Fisher (2013) | 333 caregivers (237 mothers, 31 fathers; 48 grandparents; 17 others). | Including all caregivers, age range = 19 – 70 years ( $M = 43.17$ years, $SD = 9.73$ years). |                               | Including all caregivers: Master's degree and above ( $n = 40$ ; 11.9%), bachelor degree ( $n = 118$ ; 35.6%), high school diploma ( $n = 75$ ; 22.4%), primary school |                                                   | One child (55.2%), two-children (38.9%), three-children (4.3%), four-children (1.3%), five-children (0.3%). |

| <b>Study</b>                 | <b><i>N</i></b>                                                           | <b>Age of Mother</b>                                               | <b>Age of Father</b>                                               | <b>Mothers' Education/<br/>Employment Status</b>                                                                                                                               | <b>Fathers' Education/<br/>Employment Status.</b> | <b>No. of Children</b>                                                                                                                                                                                                         |
|------------------------------|---------------------------------------------------------------------------|--------------------------------------------------------------------|--------------------------------------------------------------------|--------------------------------------------------------------------------------------------------------------------------------------------------------------------------------|---------------------------------------------------|--------------------------------------------------------------------------------------------------------------------------------------------------------------------------------------------------------------------------------|
|                              |                                                                           |                                                                    |                                                                    | (n = 84; 25.4%), did not respond (n = 16; 4.7%).                                                                                                                               |                                                   |                                                                                                                                                                                                                                |
| Xue, Ooh, and Magiati (2014) | 65 (46 mothers, 19 fathers).                                              | <i>M</i> = 37.9 years (n = 45; one mother did not report her age). | <i>M</i> = 42.2 years (n = 18; one father did not report his age). | Including both fathers and mothers: undergraduate degree and above (n = 34; 53.1%), diploma or professional qualification (n = 16; 25%), 'A' levels and below (n = 14; 21.9%). |                                                   | 15 parents (23.1%) had the child with ASD as their only child; 42 (64.6%) parents had one more child in addition to the child with ASD, whereas 8 (12.3%) parents had more than one child in addition to their child with ASD. |
| Yeo and Lu (2012)            | 128 mothers (64 from Johor Bahru, Malaysia; and 64 from Hangzhou, China). | Majority (n = 71; 55.5%) were in the age range: 21 – 30 years.     | n/a                                                                | Not stated.                                                                                                                                                                    | n/a                                               | Not stated.                                                                                                                                                                                                                    |
